# Supplementary material
Source: HighWire-hosted journal article supplement (http://www.ajnr.org/highwire/filestream/52105/field_highwire_adjunct_files/0/2459_tables.pdf)
Supplement: 2459_tables.pdf [file 2459_tables.pdf]

| On-line Table 1: Subject demographics and clinical characteristics |                    |                                  |                    |                               |
|--------------------------------------------------------------------|--------------------|----------------------------------|--------------------|-------------------------------|
|                                                                    | RRMS/CIS           | PPMS/SPMS                        | All MS             | Controls                      |
| Total patients (No.)                                               | 29                 | 6                                | 35                 | 27                            |
| Sex (female/male ratio)                                            | 23 F, 6 M (3.83:1) | 4 F, 2 M (2:1)                   | 27 F, 8 M (3.38:1) | 20 F, 7 M (2.86:1)            |
| Age (yr) (mean, range)                                             | 39.9 ± 8.5, 25–53) | 49.5 ± 4.8, 44–55                | 41.5 ± 8.7, 25–55  | 42.2 ± .1, 30–53 <sup>a</sup> |
| Disease duration (yr) (mean, range)                                | 6.3 ± 6.1, 0.2–23) | 18.1 ± 12.0, 6–30 <sup>b</sup>   | 8.3 ± 8.5, 0.2–30  | — <sup>c</sup>                |
| EDSS score (mean, range)                                           | 1.4 ± 0.96, 0–4.0) | 5.0 ± 1.48, 3.5–6.5 <sup>d</sup> | 2.0 ± 1.72, 0–6.5  | — <sup>c</sup>                |

<sup>a</sup> Age comparison of grouped MS (RRMS/CIS + PPMS/SPMS) versus controls ( $P = .74$ ).

<sup>b</sup> Disease duration comparison of RRMS/CIS versus PPMS/SPMS ( $P = .06$ ).

<sup>c</sup> — = not applicable.

<sup>d</sup> EDSS score comparison of RRMS/CIS versus PPMS/SPMS ( $P = .001$ ).

| On-line Table 2: All patients with MS versus controls <sup>a</sup> |                                       |                       |                                       |                       |                                             |
|--------------------------------------------------------------------|---------------------------------------|-----------------------|---------------------------------------|-----------------------|---------------------------------------------|
| Vertebral Level                                                    | All MS                                |                       | Controls                              |                       | Age-Adjusted $P$ Value (All MS vs Controls) |
|                                                                    | Mean Cord Volume (Volume/Section/ICV) | SD                    | Mean Cord Volume (Volume/Section/ICV) | SD                    |                                             |
| WC                                                                 | $9.79 \times 10^{-5}$                 | $1.21 \times 10^{-5}$ | $9.45 \times 10^{-5}$                 | $1.29 \times 10^{-5}$ | .30                                         |
| C1-C2                                                              | $1.48 \times 10^{-4}$                 | $1.93 \times 10^{-5}$ | $1.46 \times 10^{-4}$                 | $1.77 \times 10^{-5}$ | .74                                         |
| C3                                                                 | $1.47 \times 10^{-4}$                 | $2.13 \times 10^{-5}$ | $1.44 \times 10^{-4}$                 | $2.24 \times 10^{-5}$ | .6                                          |
| C4                                                                 | $1.58 \times 10^{-4}$                 | $2.31 \times 10^{-5}$ | $1.51 \times 10^{-4}$                 | $2.60 \times 10^{-5}$ | .27                                         |
| C5                                                                 | $1.55 \times 10^{-4}$                 | $2.38 \times 10^{-5}$ | $1.45 \times 10^{-4}$                 | $2.57 \times 10^{-5}$ | .16                                         |
| C6                                                                 | $1.35 \times 10^{-4}$                 | $2.35 \times 10^{-5}$ | $1.31 \times 10^{-4}$                 | $2.43 \times 10^{-5}$ | .49                                         |
| C7                                                                 | $1.08 \times 10^{-4}$                 | $1.93 \times 10^{-5}$ | $1.09 \times 10^{-4}$                 | $2.10 \times 10^{-5}$ | .95                                         |
| T1                                                                 | $9.41 \times 10^{-5}$                 | $1.43 \times 10^{-5}$ | $9.35 \times 10^{-5}$                 | $1.66 \times 10^{-5}$ | .87                                         |
| T2                                                                 | $8.60 \times 10^{-5}$                 | $1.33 \times 10^{-5}$ | $8.62 \times 10^{-5}$                 | $1.29 \times 10^{-5}$ | .98                                         |
| T3                                                                 | $8.19 \times 10^{-5}$                 | $1.27 \times 10^{-5}$ | $7.97 \times 10^{-5}$                 | $1.21 \times 10^{-5}$ | .46                                         |
| T4                                                                 | $7.79 \times 10^{-5}$                 | $1.16 \times 10^{-5}$ | $7.57 \times 10^{-5}$                 | $9.61 \times 10^{-6}$ | .42                                         |
| T5                                                                 | $7.57 \times 10^{-5}$                 | $9.56 \times 10^{-6}$ | $7.44 \times 10^{-5}$                 | $1.03 \times 10^{-5}$ | .57                                         |
| T6                                                                 | $7.37 \times 10^{-5}$                 | $9.61 \times 10^{-6}$ | $7.17 \times 10^{-5}$                 | $1.04 \times 10^{-5}$ | .4                                          |
| T7                                                                 | $7.51 \times 10^{-5}$                 | $1.22 \times 10^{-5}$ | $7.16 \times 10^{-5}$                 | $9.29 \times 10^{-6}$ | .22                                         |
| T8                                                                 | $7.60 \times 10^{-5}$                 | $1.11 \times 10^{-5}$ | $7.22 \times 10^{-5}$                 | $9.63 \times 10^{-6}$ | .16                                         |
| T9                                                                 | $7.82 \times 10^{-5}$                 | $1.20 \times 10^{-5}$ | $7.19 \times 10^{-5}$                 | $1.09 \times 10^{-5}$ | .04 <sup>b</sup>                            |
| T10                                                                | $8.33 \times 10^{-5}$                 | $1.13 \times 10^{-5}$ | $7.55 \times 10^{-5}$                 | $1.22 \times 10^{-5}$ | .01 <sup>b</sup>                            |
| T11                                                                | $9.87 \times 10^{-5}$                 | $1.60 \times 10^{-5}$ | $8.72 \times 10^{-5}$                 | $2.34 \times 10^{-5}$ | .03 <sup>b</sup>                            |
| T12                                                                | $9.78 \times 10^{-5}$                 | $2.83 \times 10^{-5}$ | $8.67 \times 10^{-5}$                 | $3.66 \times 10^{-5}$ | .18                                         |

<sup>a</sup> Age-adjusted  $P$  values of mean cord volume, not corrected for multiple comparisons, were statistically significant at the T9, T10, and T11 vertebral levels but did not remain statistically significant following correction for multiple comparisons. Cord volumes are presented as fractions, and are, therefore, unitless.

<sup>b</sup> Statistically significant.

| On-line Table 3: Group comparisons <sup>a</sup> |                                       |                       |                                       |                       |                                       |                       |                        |                      |                       |
|-------------------------------------------------|---------------------------------------|-----------------------|---------------------------------------|-----------------------|---------------------------------------|-----------------------|------------------------|----------------------|-----------------------|
| Vertebral Level                                 | RRMS/CIS                              |                       | PPMS/SPMS                             |                       | Controls                              |                       | Age-Adjusted $P$ Value |                      |                       |
|                                                 | Mean Cord Volume (Volume/Section/ICV) |                       | Mean Cord Volume (Volume/Section/ICV) |                       | Mean Cord Volume (Volume/Section/ICV) |                       | PPMS/SPMS vs Controls  | RRMS/CIS vs Controls | PPMS/SPMS vs RRMS/CIS |
|                                                 | Volume (Volume/Section/ICV)           | SD                    | Volume (Volume/Section/ICV)           | SD                    | Volume (Volume/Section/ICV)           | SD                    |                        |                      |                       |
| WC                                              | $1.00 \times 10^{-4}$                 | $1.09 \times 10^{-5}$ | $8.74 \times 10^{-5}$                 | $1.29 \times 10^{-5}$ | $9.45 \times 10^{-5}$                 | $1.29 \times 10^{-5}$ | .21                    | .07                  | .02 <sup>b</sup>      |
| C1-C2                                           | $1.53 \times 10^{-4}$                 | $1.67 \times 10^{-5}$ | $1.26 \times 10^{-4}$                 | $1.62 \times 10^{-5}$ | $1.46 \times 10^{-4}$                 | $1.77 \times 10^{-5}$ | .01 <sup>b</sup>       | .13                  | .001 <sup>b,c</sup>   |
| C3                                              | $1.52 \times 10^{-4}$                 | $1.82 \times 10^{-5}$ | $1.22 \times 10^{-4}$                 | $1.89 \times 10^{-5}$ | $1.44 \times 10^{-4}$                 | $2.24 \times 10^{-5}$ | .03 <sup>b</sup>       | .11                  | .001 <sup>b,c</sup>   |
| C4                                              | $1.62 \times 10^{-4}$                 | $2.08 \times 10^{-5}$ | $1.36 \times 10^{-4}$                 | $2.34 \times 10^{-5}$ | $1.51 \times 10^{-4}$                 | $2.60 \times 10^{-5}$ | .23                    | .06                  | .01 <sup>b</sup>      |
| C5                                              | $1.59 \times 10^{-4}$                 | $2.17 \times 10^{-5}$ | $1.34 \times 10^{-4}$                 | $2.45 \times 10^{-5}$ | $1.45 \times 10^{-4}$                 | $2.57 \times 10^{-5}$ | .35                    | .03 <sup>b</sup>     | .01 <sup>b</sup>      |
| C6                                              | $1.40 \times 10^{-4}$                 | $2.23 \times 10^{-5}$ | $1.13 \times 10^{-4}$                 | $1.53 \times 10^{-5}$ | $1.31 \times 10^{-4}$                 | $2.43 \times 10^{-5}$ | .09                    | .12                  | .01 <sup>b</sup>      |
| C7                                              | $1.11 \times 10^{-4}$                 | $1.86 \times 10^{-5}$ | $9.42 \times 10^{-5}$                 | $1.81 \times 10^{-5}$ | $1.09 \times 10^{-4}$                 | $2.10 \times 10^{-5}$ | .2                     | .55                  | .03 <sup>b</sup>      |
| T1                                              | $9.64 \times 10^{-5}$                 | $1.37 \times 10^{-5}$ | $8.32 \times 10^{-5}$                 | $1.27 \times 10^{-5}$ | $9.35 \times 10^{-5}$                 | $1.66 \times 10^{-5}$ | .13                    | .39                  | .02 <sup>b</sup>      |
| T2                                              | $8.74 \times 10^{-5}$                 | $1.32 \times 10^{-5}$ | $7.90 \times 10^{-5}$                 | $1.26 \times 10^{-5}$ | $8.62 \times 10^{-5}$                 | $1.29 \times 10^{-5}$ | .16                    | .54                  | .06                   |
| T3                                              | $8.24 \times 10^{-5}$                 | $1.19 \times 10^{-5}$ | $7.98 \times 10^{-5}$                 | $1.75 \times 10^{-5}$ | $7.97 \times 10^{-5}$                 | $1.21 \times 10^{-5}$ | .75                    | .31                  | .45                   |
| T4                                              | $7.94 \times 10^{-5}$                 | $1.13 \times 10^{-5}$ | $7.07 \times 10^{-5}$                 | $1.14 \times 10^{-5}$ | $7.57 \times 10^{-5}$                 | $9.61 \times 10^{-6}$ | .19                    | .14                  | .05                   |
| T5                                              | $7.69 \times 10^{-5}$                 | $9.05 \times 10^{-6}$ | $7.02 \times 10^{-5}$                 | $1.09 \times 10^{-5}$ | $7.44 \times 10^{-5}$                 | $1.03 \times 10^{-5}$ | .31                    | .23                  | .05                   |
| T6                                              | $7.54 \times 10^{-5}$                 | $8.21 \times 10^{-6}$ | $6.56 \times 10^{-5}$                 | $1.25 \times 10^{-5}$ | $7.17 \times 10^{-5}$                 | $1.04 \times 10^{-5}$ | .11                    | .07                  | .01 <sup>b</sup>      |
| T7                                              | $7.67 \times 10^{-5}$                 | $9.20 \times 10^{-6}$ | $6.70 \times 10^{-5}$                 | $2.12 \times 10^{-5}$ | $7.16 \times 10^{-5}$                 | $9.29 \times 10^{-6}$ | .29                    | .02 <sup>b</sup>     | .04 <sup>b</sup>      |
| T8                                              | $7.75 \times 10^{-5}$                 | $9.14 \times 10^{-6}$ | $6.88 \times 10^{-5}$                 | $1.73 \times 10^{-5}$ | $7.22 \times 10^{-5}$                 | $9.63 \times 10^{-6}$ | .38                    | .03 <sup>b</sup>     | .06                   |
| T9                                              | $8.02 \times 10^{-5}$                 | $1.02 \times 10^{-5}$ | $6.85 \times 10^{-5}$                 | $1.62 \times 10^{-5}$ | $7.19 \times 10^{-5}$                 | $1.09 \times 10^{-5}$ | .56                    | .005 <sup>b</sup>    | .04 <sup>b</sup>      |
| T10                                             | $8.56 \times 10^{-5}$                 | $1.04 \times 10^{-5}$ | $7.23 \times 10^{-5}$                 | $9.31 \times 10^{-6}$ | $7.55 \times 10^{-5}$                 | $1.22 \times 10^{-5}$ | .44                    | .002 <sup>b,c</sup>  | .03 <sup>b</sup>      |
| T11                                             | $1.01 \times 10^{-4}$                 | $1.44 \times 10^{-5}$ | $9.03 \times 10^{-5}$                 | $2.20 \times 10^{-5}$ | $8.72 \times 10^{-5}$                 | $2.34 \times 10^{-5}$ | .95                    | .01 <sup>b</sup>     | .41                   |
| T12                                             | $9.90 \times 10^{-5}$                 | $2.91 \times 10^{-5}$ | $9.20 \times 10^{-5}$                 | $2.56 \times 10^{-5}$ | $8.67 \times 10^{-5}$                 | $3.66 \times 10^{-5}$ | .92                    | .14                  | .39                   |

<sup>a</sup> Age-adjusted  $P$  values of mean cord volume, not corrected for multiple comparisons, were statistically significant as shown. Cord volumes are presented as fractions and are, therefore, unitless.

<sup>b</sup> Statistically significant.

<sup>c</sup>  $P$  values that remained statistically significant following correction for multiple comparisons.
